# Supplementary material for: Mitochondrial Genome Sequence of the Scabies Mite Provides Insight into the Genetic Diversity of Individual Scabies Infections
Source: PLoS Negl Trop Dis. 2016 Feb 12;10(2):e0004384. doi: 10.1371/journal.pntd.0004384 (PMC4752359; doi:10.1371/journal.pntd.0004384)
Supplement: S3 Table — (XLSX) [file pntd.0004384.s005.xlsx]

## Sheet: Sheet1
Sample	No of Clusters	Cluster Indices	Sub-Cluster indices	Sub-Sub-Cluster Indices	No of SNPs	Cluster Mean	Cluster Label
Human Patient B	1	1	-		598	0.0230063	B1
Human Patient A	5	1	-		593	0.998428	A1
		2	-		2	0.9508	A2
		3	-		1	0.8686	A3
		4	1		1	0.3747	A4
			2		4	0.017875	A5
Pig Unwashed	4	1	-		68	0.99885	U1
		2	-		14	0.885443	U2
		3	1		14	0.0959214	U3
			2	1	1	0.0504	U4
				2	5	0.0157	U5
Pig Washed 1	5	1	-		68	0.99951	W1-1
		2	-		14	0.9111	W1-2
		3	1		1	0.1765	W1-3
			2		14	0.0705357	W1-4
			3		5	0.0137	W1-5
Pig Washed 2	5	1			67	0.99967	W2-1
		2			14	0.892893	W2-2
		3	1		1	0.2502	W2-3
			2		14	0.0894	W2-4
			3		4	0.019625	W2-5
Pig Washed 3	5	1			67	0.999551	W3-1
		2			14	0.898036	W3-2
		3	1		1	0.1911	W3-3
			2		14	0.0894286	W3-4
			3		6	0.0146833	W3-5
Haplotypes	Clusters in Haplotypes	No of SNPs	Estimated Frequency	Comments
H1_B_REF	Reference Genome Haplotype	-	0.976994
H2_B	B1	598	0.0230063
H1_A	A1	593	0.998428	Ignoring A2, A3, A4 for limited evidence
H2_A	A1 + A5	597	0.017875
H1_u	U1 + U2	82	0.885443
H2_u	U1 + U3	82	0.0959214
H3_u	U1 + U2 + U5	87	0.0157	SNP at 9221 (C) omitted for limited evidence - cluster U4
H1_w1	W1-1 + W1-2	82	0.9111
H2_w1	W1-1 + W1-4	82	0.0705357
H3_w1	W1-1 + W1-2 + W1-5	87	0.0137	SNP at 9221 (C) omitted for limited evidence - cluster W1-3
H1_w2	W2-1 + W2-2	81	0.892893
H2_w2	W2-1 + W2-4	81	0.0894
H3_w2	W2-1 + W2-2 + W2-5	85	0.019625	SNP at 9221 (C) omitted for limited evidence - cluster W2-3
H1_w3	W3-1 + W3-2	81	0.898036
H2_w3	W3-1 + W3-4	81	0.0894286
H3_w3	W3-1 + W3-2 + W3-5	87	0.0146833	SNP at 9221 (C) omitted for limited evidence - cluster W3-3
