# Supplementary material for: Mitochondrial Genome Sequence of the Scabies Mite Provides Insight into the Genetic Diversity of Individual Scabies Infections
Source: PLoS Negl Trop Dis. 2016 Feb 12;10(2):e0004384. doi: 10.1371/journal.pntd.0004384 (PMC4752359; doi:10.1371/journal.pntd.0004384)
Supplement: S5 Table — (XLSX) [file pntd.0004384.s007.xlsx]

## Sheet: Sheet1
Accession numbers of mt genomes used in gene arrangement comparison in figure 4
Genome	Accession Number
Limulus polyphemus mitochondrion	NC_003057
Tetranychus urticae mitochondrion	EU345430
Dermatophagoides pteronyssinus mitochondrion	EU884425
Psoroptes cuniculi mitochondrion	NC_024675
Sarcoptes scabiei type hominis mitochondrion	LN874268
